# Supplementary material
Source: publisher figshare collection journal article supplement (https://acs.figshare.com/ndownloader/files/8400500)
Supplement: Supplementary file 1 [file 8400500]

## Supporting Information

# **Equilibrium Overcompensation in Polyelectrolyte Complexes**

Hadi M. Fares and Joseph B. Schlenoff\*

Department of Chemistry and Biochemistry,  
The Florida State University, Tallahassee, Florida 32306-4390, United States

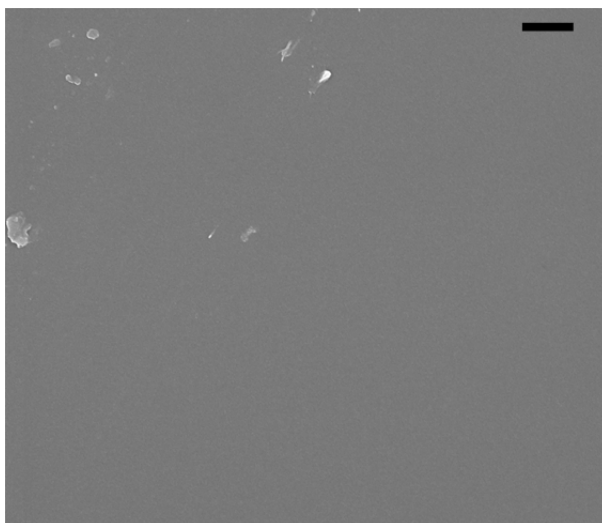

**Figure S 1.** SEM image of (PDADMA/PSS)<sub>20</sub> cycled 6 times between 30 min 2 M NaCl and 5 min 10 mM PSS79 in 1 M NaCl. Scale bar is 1  $\mu\text{m}$ .

**Table S1.** Peak assignments for PDADMA/PSS films in transmission FTIR. Assignment is done based on separate and combined polymer spectra, and on the works of Yang et al.,<sup>1</sup> and Mwangi et al.<sup>2</sup>

| Polymer                                                                                          | Peak                  | Functional group                                                                     |
|--------------------------------------------------------------------------------------------------|-----------------------|--------------------------------------------------------------------------------------|
| PDADMA<br>(obtained by subtracting 5% of 1010 and 1036 $\text{cm}^{-1}$ PSS peaks combined area) | 1473 $\text{cm}^{-1}$ | C=C stretching<br>(in a positively charged environment, contributed by the nitrogen) |
| PSS                                                                                              | 1010 $\text{cm}^{-1}$ | Aromatic ring                                                                        |
|                                                                                                  | 1036 $\text{cm}^{-1}$ | Sulfonate group                                                                      |
|                                                                                                  | 1125 $\text{cm}^{-1}$ | Aromatic ring                                                                        |
|                                                                                                  | 1194 $\text{cm}^{-1}$ | Sulfonate group                                                                      |
| Nitrate                                                                                          | 1345 $\text{cm}^{-1}$ |                                                                                      |

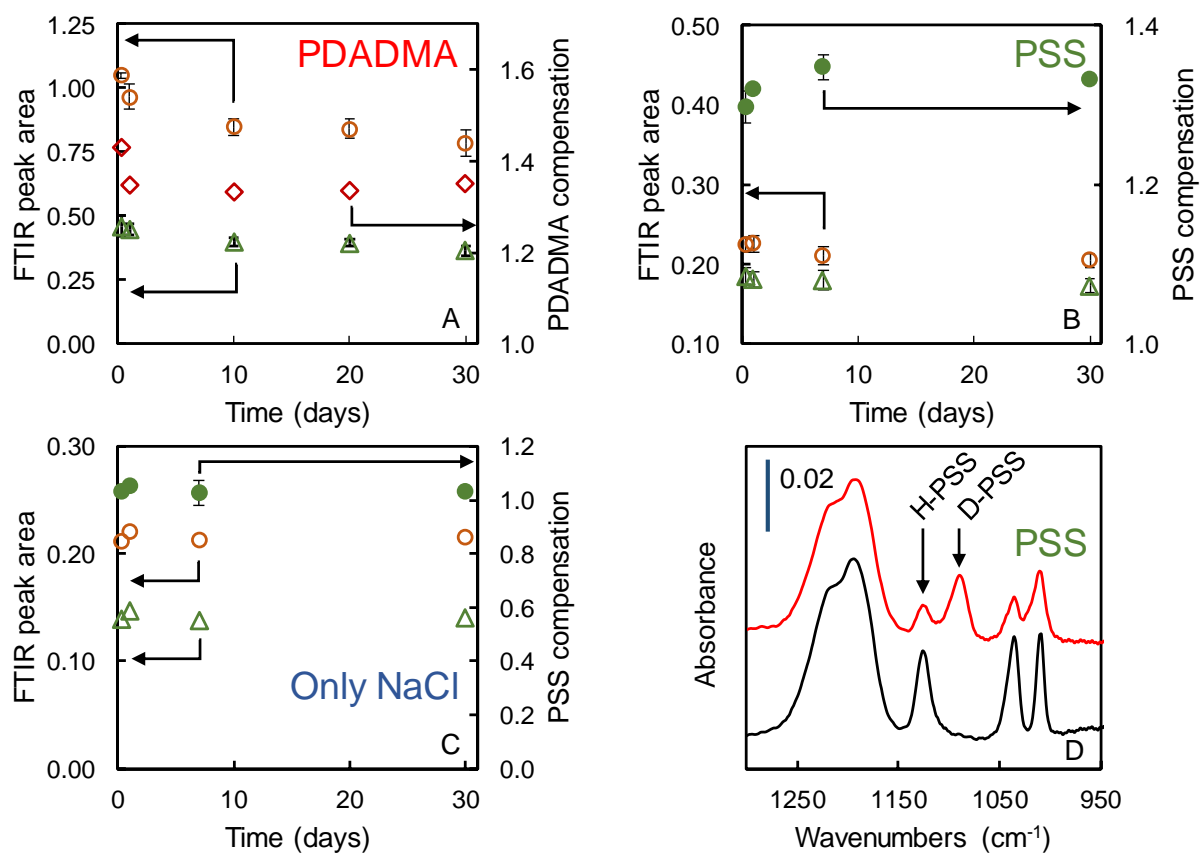

**Figure S 2.** (A) FTIR peak areas of PDADMA (○), PSS (△), and PDADMA/PSS (◇) ratio when the (PDADMA/PSS)<sub>20</sub> cycled film is soaked in 10 mM PDADMA500 in 1 M NaCl for an extended duration. (B) FTIR peak areas of PDADMA (○), PSS (△), and PSS/PDADMA (●) ratio when a stoichiometric (PDADMA/PSS)<sub>10</sub> film is soaked in 10 mM PSS79 in 1 M NaCl for an extended duration. (C) Stoichiometric (PDADMA/PSS)<sub>10</sub> soaked in 1 M NaCl (only salt) for an extended duration. (D) Lower spectrum (black): (PDADMA/PSS)<sub>10</sub> film, made and cycled with PSS127, then soaked in PSS127 in 1.4 M NaCl for 4h until overcompensation equilibrium is reached. Upper spectrum (red): After overcompensation equilibrium is reached, the same film is immersed in deuterated PSS, D-PSS110, for 30 days showing exchange of PSS by D-PSS (a decrease in the H-PSS peak and an increase in the D-PSS peak).

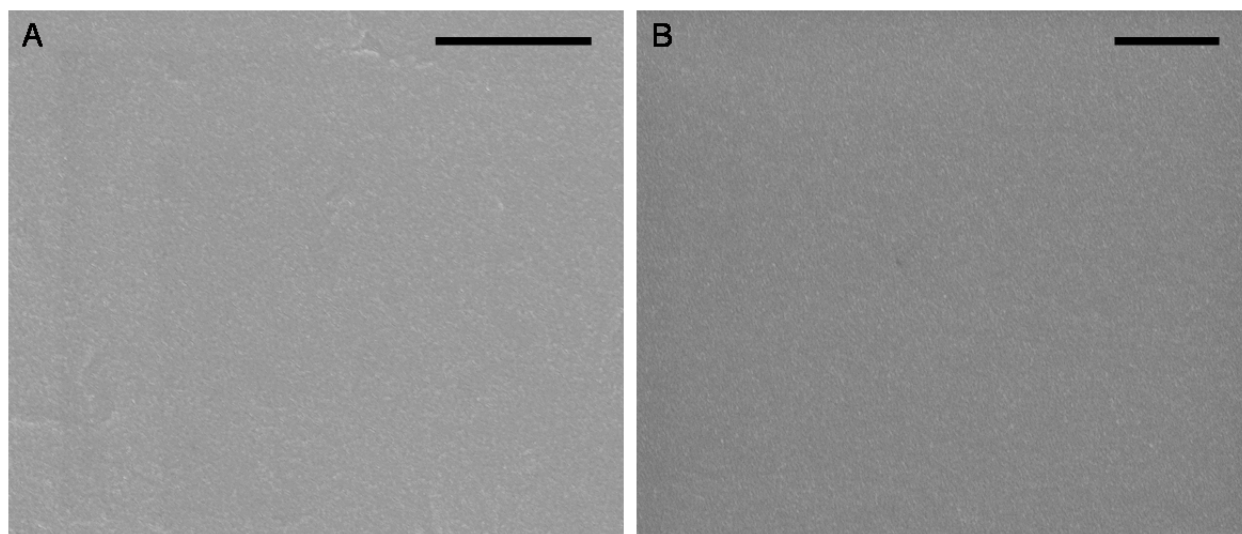

**Figure S 3.** (A) SEM image of (PDADMA/PSS)<sub>20</sub> after 3 h in 10 mM PDADMA500 in 1 M NaCl. (B) SEM image of (PDADMA/PSS)<sub>20</sub> after 2 h in 10 mM PSS79 in 1.4 M NaCl. Scale bars are 1 μm. Scratches were from repetitive manipulation.

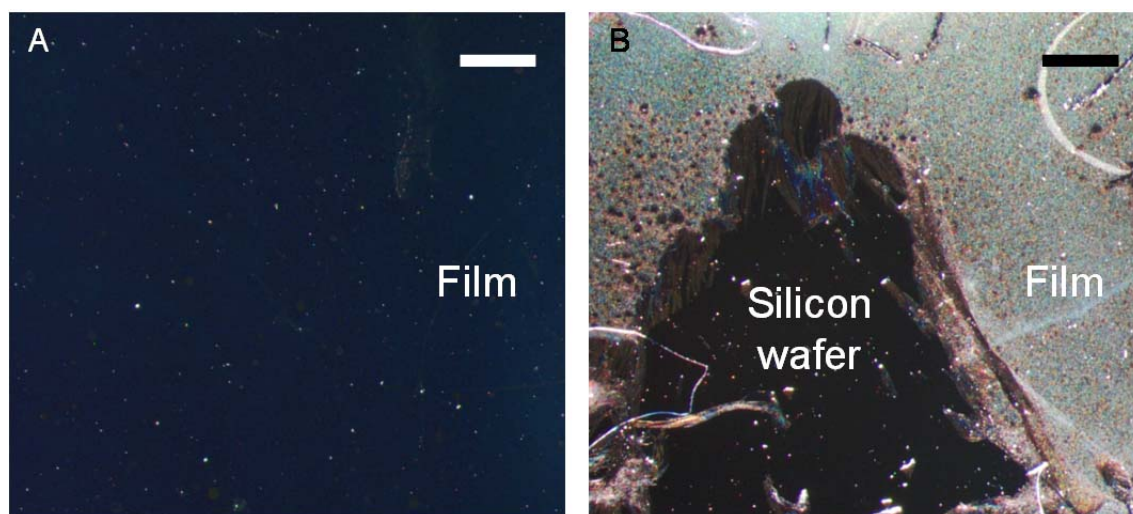

**Figure S 4.** (A) Representative image of a PSS overcompensated 20 layer film after 2 h in 10 mM PSS79 in 1 M NaCl. (B) Image of a PSS overcompensated film showing the effect of erosion after 2 h in 10 mM PSS600 in 1.4 M NaCl. Scale bars are 1 mm.

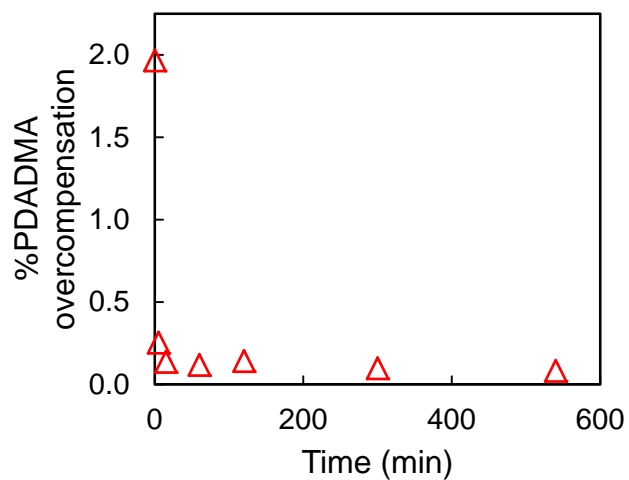

**Figure S 5.**  $^{22}\text{NaI}$  radiolabeling during the addition of 10 mM PDADMA in 1 M NaCl to a stoichiometric (PDADMA/PSS) $_{20}$  film. The  $^{22}\text{Na}$ , taken here as percent of PDADMA overcompensation, is used to show that no neutral salt enters the film during overcompensation.

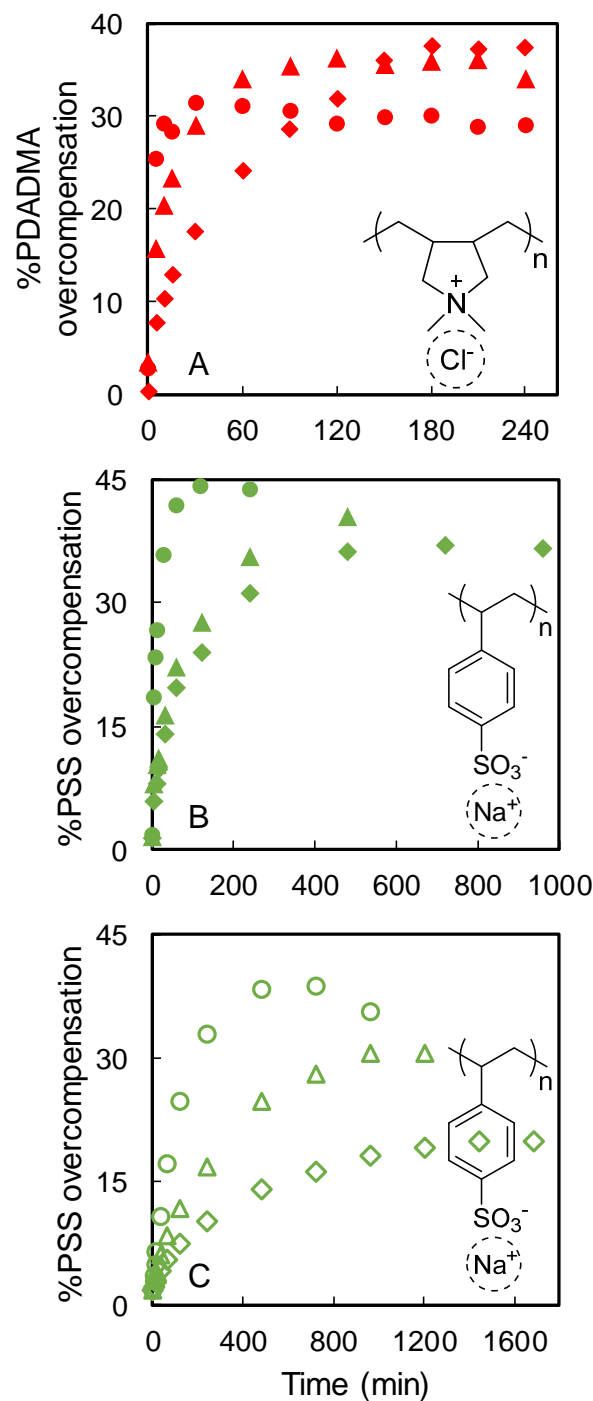

**Figure S 6.** (A) PDADMA percent overcompensation during addition of 10 mM PDADMA500 in 1 M NaCl to stoichiometric 20 (●), 30 (▲) and 40 (◆) layer (PDADMA/PSS) films. Precision is  $\pm 4\%$  on average. (B) PSS percent overcompensation during the addition of 10 mM PSS79 in 1.4 M NaCl to stoichiometric 20 (●), 30 (▲) and 40 (◆) layer (PDADMA/PSS) films, and (C) during addition of 10 mM PSS79 in 1 M NaCl to stoichiometric 20 (○), 30 (△), and 40 (◇) layers of the same type of films. Precision is  $\pm 2\%$  on average.

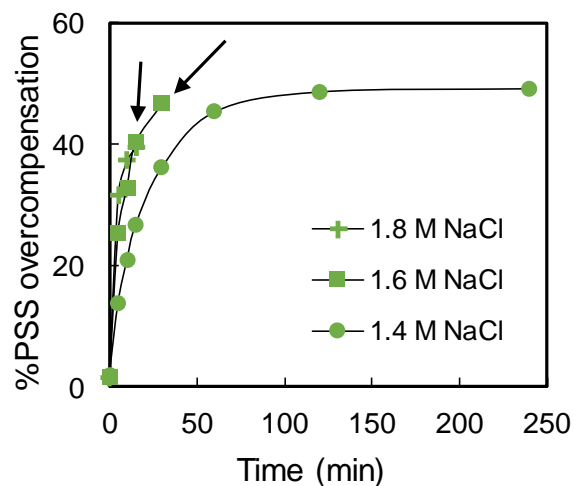

**Figure S 7.** PSS overcompensation during the addition of 10 mM PSS79 in 1.4 (●), 1.6 (■), and 1.8 M (+) NaCl to stoichiometric (PDADMA/PSS)<sub>10</sub> films. The arrows show the point where the films significantly erode and dissolve. Lines are a guide to the eye.

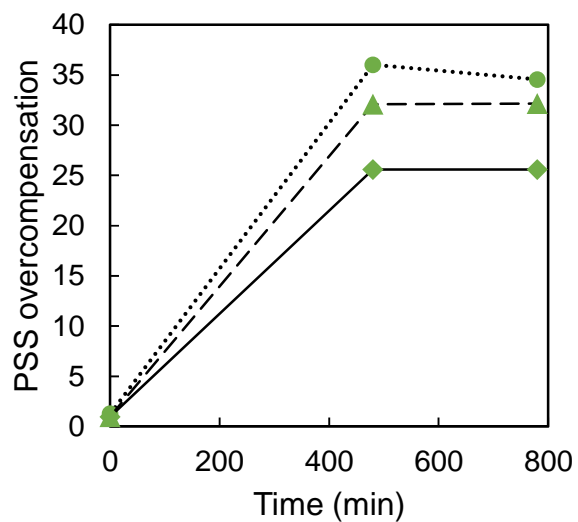

**Figure S 8.** PSS overcompensation obtained by  $^{22}\text{Na}^+$  radiolabeling of stoichiometric 20 (●), 30 (▲) and 40 (◆) layer PEC films soaked in 10 mM PSS in 1.4 M NaCl for 8 and 13 h respectively.

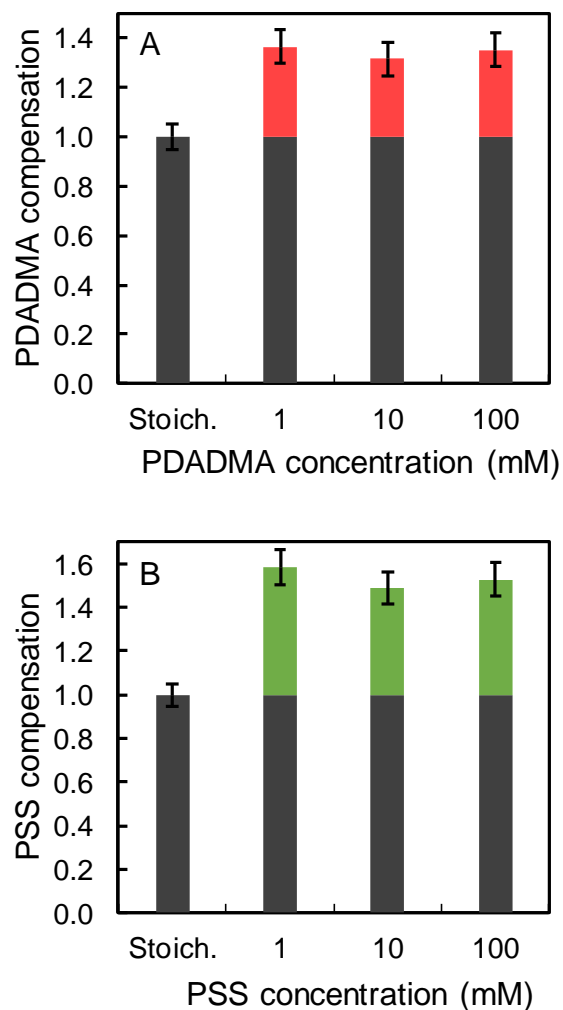

**Figure S 9.** (A) Normalized FTIR PDADMA/PSS peak areas in overcompensated films prepared by soaking stoichiometric (PDADMA/PSS)<sub>20</sub> in 1, 10 and 100 mM PDADMA500 in 1 M NaCl for 20 h. (B) Normalized FTIR PSS/PDADMA peak areas in overcompensated films prepared by soaking stoichiometric (PDADMA/PSS)<sub>10</sub> in 1, 10 and 100 mM PSS79 in 1.4 M NaCl for 4 h. Normalization is done relatively to the stoichiometric film.



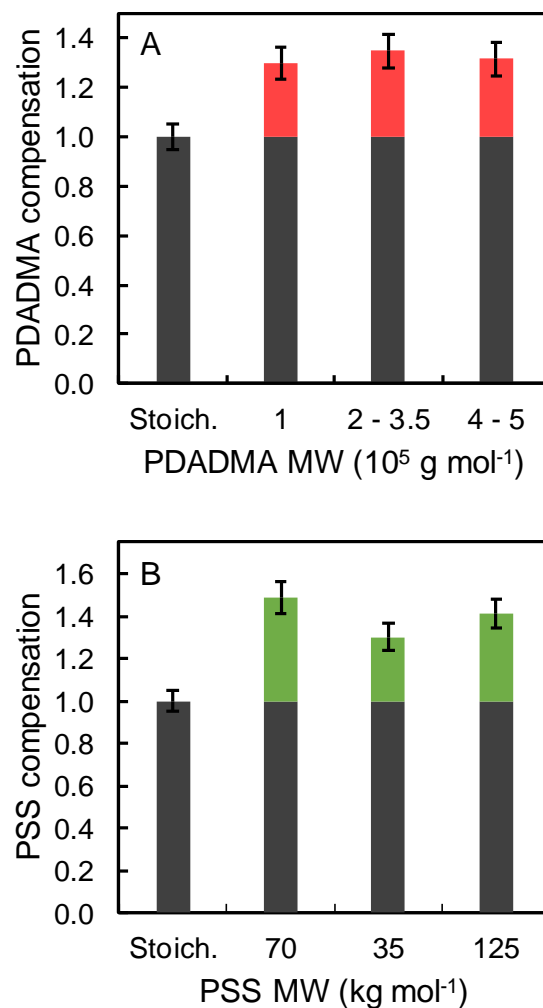

**Figure S 10.** (A) Normalized FTIR PDADMA/PSS peak areas in overcompensated films prepared by soaking stoichiometric  $(\text{PDADMA/PSS})_{20}$  in different wide molecular weight 10 mM PDADMA500 in 1 M NaCl for 20 h. (B) FTIR PSS/PDADMA peak areas in overcompensated films prepared by soaking stoichiometric  $(\text{PDADMA/PSS})_{10}$  in 10 mM PSS70 in 1.4 M NaCl for 4 h. Normalization is done relatively to the stoichiometric film.

### Ion components – with $\text{Pol}^+$ overcompensating $\text{Pol}^-$ :

**Table S2.** Components taken into consideration in the calculation of the concentration inside the films vs outside. The corresponding density values are used to obtain the final form of the equation.

| Component                                                                                                                                                 | Symbol for density                 | Density used<br>(g L <sup>-1</sup> ) | Molecular<br>weight (g mol <sup>-1</sup> ) |
|-----------------------------------------------------------------------------------------------------------------------------------------------------------|------------------------------------|--------------------------------------|--------------------------------------------|
| $\text{Pol}^+/\text{Pol}^-$ pair (intrinsic site)                                                                                                         | $\rho_{\text{Pol}^+/\text{Pol}^-}$ | 1200                                 | 310<br>(PDADMA/PSS)                        |
| $\sigma \text{ Pol}^+$ added                                                                                                                              | $\rho_{\text{Pol}^+}$              | 1000                                 | 126 (PDADMA)                               |
| $\sigma \text{ A}^-$ (overcompensation)                                                                                                                   | $\rho_{\text{A}^-}$                | 2000                                 | 35.5 ( $\text{Cl}^-$ )                     |
| $y \text{ A}^-$ , with $y = k[\text{A}^-]_{\text{out}}$<br>(doping), with $k = \text{sqrt of}$<br>doping value (with<br>concentrations)                   | $\rho_{\text{A}^-}$                | 2000                                 | 35.5 ( $\text{Cl}^-$ )                     |
| $y \text{ C}^+$ (doping)                                                                                                                                  | $\rho_{\text{C}^+}$                | 2000                                 | 23 ( $\text{Na}^+$ )                       |
| $m \text{ H}_2\text{O}$ for total water<br>associated with $\text{Pol}^+/\text{Pol}^-$ -<br>intrinsic site, doping water<br>and overcompensation<br>water | $\rho_{\text{H}_2\text{O}}$        | 1000                                 | 18                                         |

### References

1. Yang, J. C.; Jablonsky, M. J.; Mays, J. W. NMR and FT-IR studies of sulfonated styrene-based homopolymers and copolymers. *Polymer* **2002**, 43 (19), 5125-5132.
2. Mwangi, I. W.; Ngila, J. C.; Ndungu, P.; Msagati, T. A. M. Method Development for the Determination of Diallyldimethylammonium Chloride at Trace Levels by Epoxidation Process. *Water Air Soil Poll* **2013**, 224 (9).
